# Supplementary material
Source: bioRxiv or medRxiv preprint supplement (https://www.biorxiv.org/highwire/filestream/96629/field_highwire_adjunct_files/11/314922-5.pdf)

■ *Glucose pulse*    ■ *After antibiotic addition*

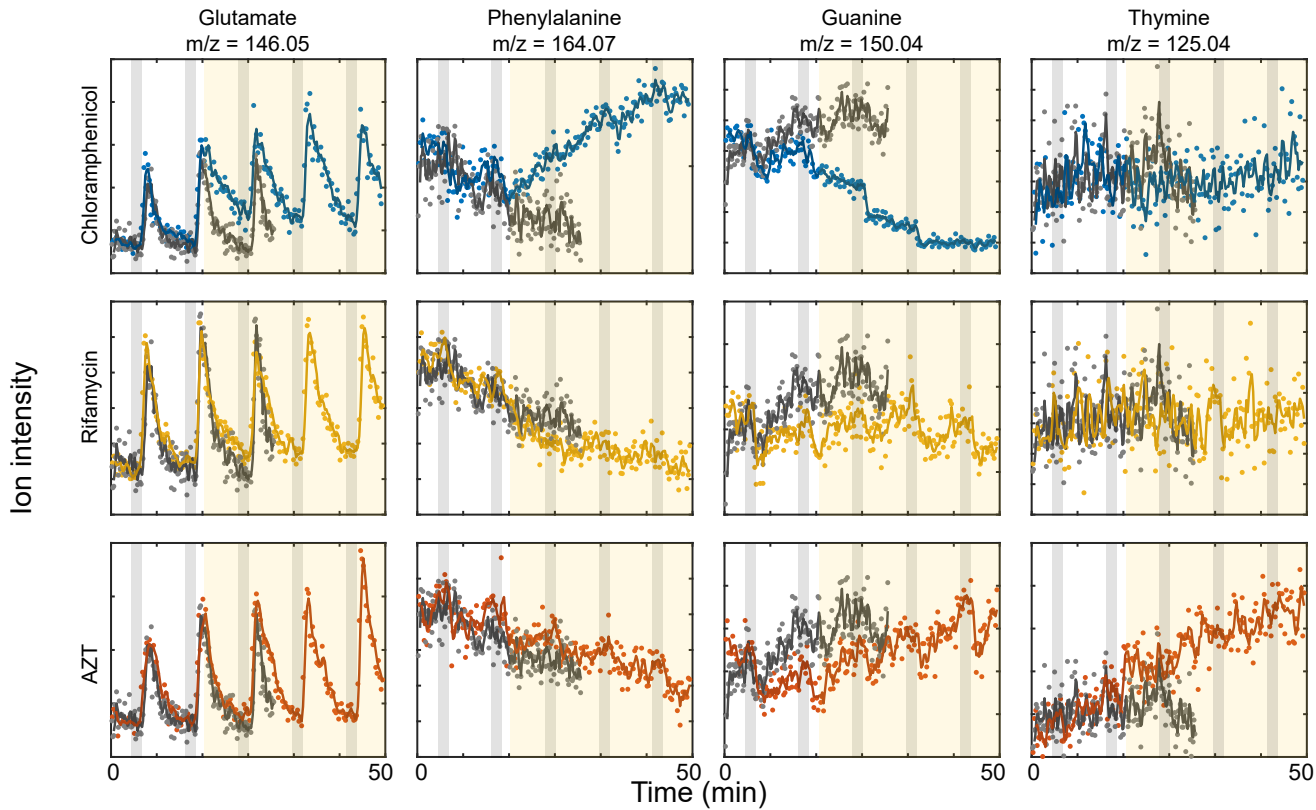

Supplement: Supplementary file [file 314922-5.pdf]
